# Supplementary material for: White-nose syndrome is associated with increased replication of a naturally persisting coronaviruses in bats
Source: PubMed Central journal article supplement (PMC6195612; doi:10.1038/s41598-018-33975-x), 2018-10-19
Supplement: 41598_2018_33975_MOESM1_ESM.pdf [file 41598_2018_33975_MOESM1_ESM.pdf]

## Supplementary information

### White-nose syndrome is associated with increased replication of a naturally persisting coronaviruses in bats

Christina M. Davy<sup>1,2,Ψ</sup>, Michael E. Donaldson<sup>1Ψ</sup>, Sonu Subudhi<sup>3Ψ</sup>, Noreen Rapin<sup>3Ψ</sup>, Lisa Warnecke<sup>4,#a</sup>, James M. Turner<sup>4,#b</sup>, Trent K. Bollinger<sup>5</sup>, Christopher J. Kyle<sup>6</sup>, Nicole Dorville<sup>4</sup>, Emma Kunkel<sup>4</sup>, Kaleigh Norquay<sup>4</sup>, Yvonne Dzal<sup>4</sup>, Craig K.R. Willis<sup>4</sup>, and Vikram Misra<sup>3\*</sup>

<sup>1</sup>Environmental and Life Sciences Graduate Program, Trent University, Peterborough, ON, Canada

<sup>2</sup>Ontario Ministry of Natural Resources and Forestry, Wildlife Research and Monitoring Section, Trent University, Peterborough, ON, Canada

<sup>3</sup>Department of Microbiology, Western College of Veterinary Medicine, University of Saskatchewan, Saskatoon, Saskatchewan, Canada

<sup>4</sup>Department of Biology, University of Winnipeg, Manitoba, Canada

<sup>#a</sup>Present address: Department of Animal Ecology and Conservation, University Hamburg, Hamburg, Hamburg, Germany

<sup>#b</sup>Present address: Institute for Land Water and Society, Charles Sturt University, Albury, New South Wales, Australia

<sup>5</sup>Canadian Wildlife Health Cooperative and Department of Pathology, Western College of Veterinary Medicine, University of Saskatchewan, Saskatoon, Saskatchewan, Canada

<sup>6</sup>Forensic Science Department, Trent University, Peterborough, ON, Canada

Ψ Contributed equally to the study

\*Corresponding author, e-mail: [vikram.misra@usask.ca](mailto:vikram.misra@usask.ca)

Supplementary figure 1

Virus-infected vs fungus-infected (461/9)

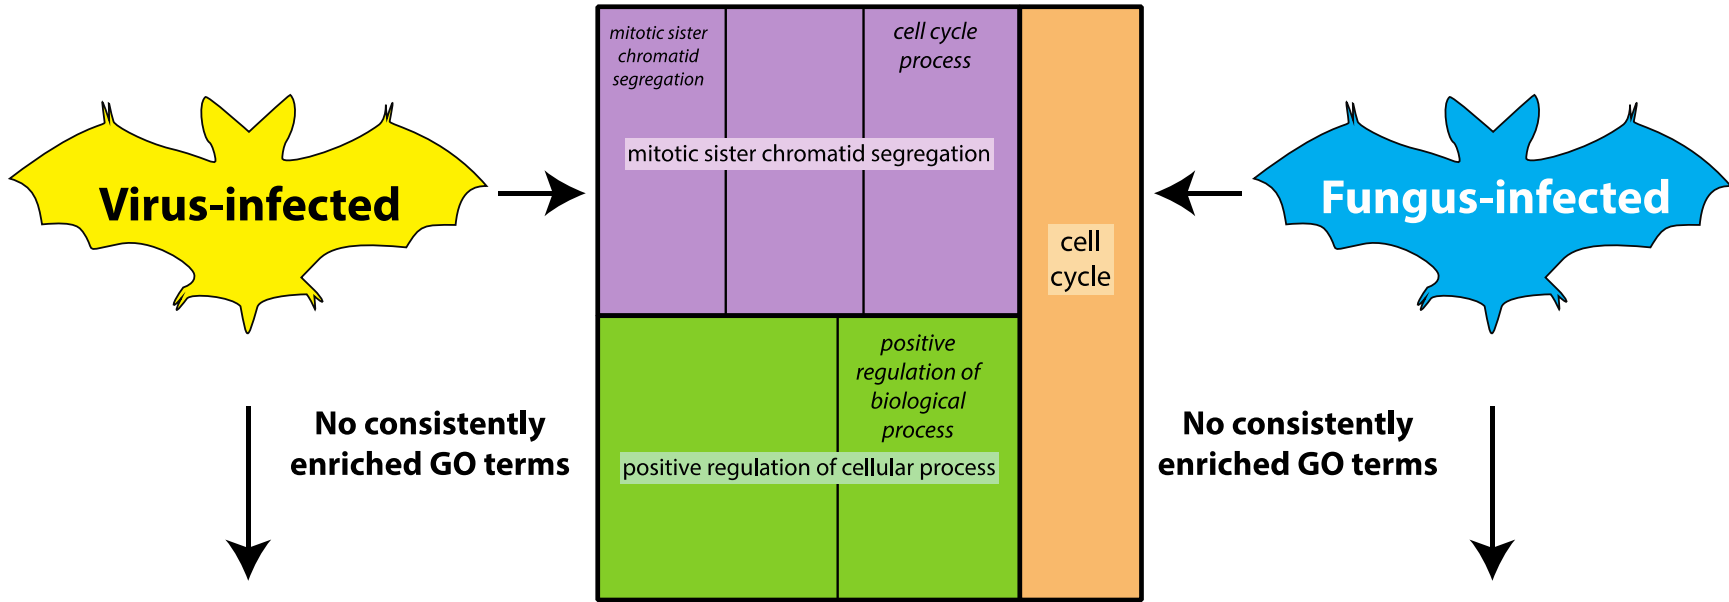

Virus-infected vs Co-infected (473/43)

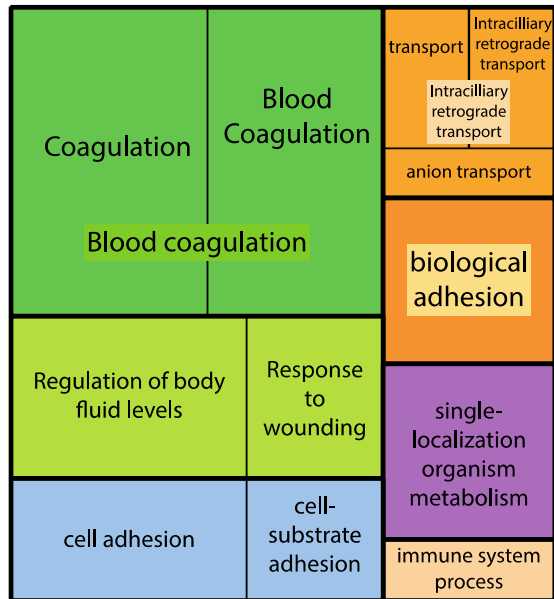

Fungus-infected vs Co-infected (25/2)

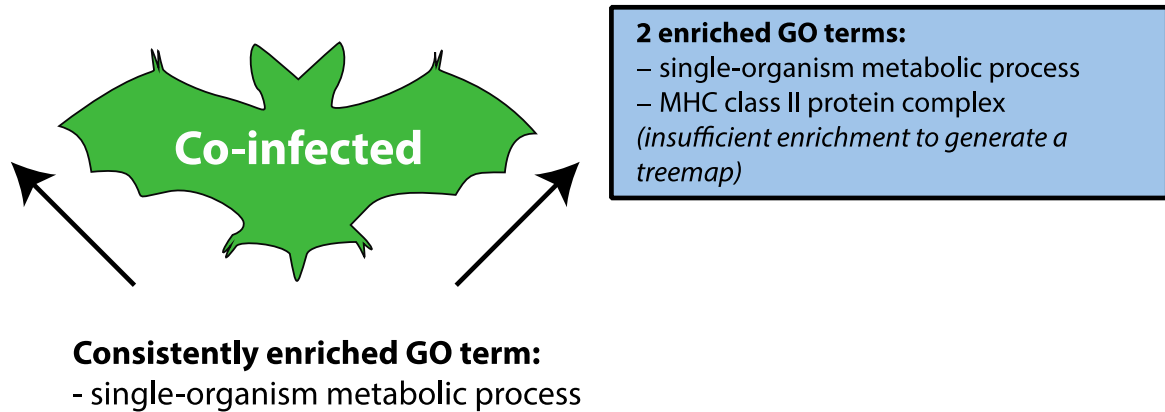

## List of supplementary tables in the Dataset file:

Table S1. Read statistics of RNA-Seq samples.

Table S2. Differentially expressed genes determined by DESeq2 for the Negative (mock-infected) vs. MylCoV comparison.

Table S3. Differentially expressed genes determined by DESeq2 for the Negative (mock-infected) vs. *P. destructans* comparison.

Table S4. Differentially expressed genes determined by DESeq2 for the Negative (mock-infected) vs. Coinfected comparison.

Table S5. Differentially expressed genes determined by DESeq2 for the MylCoV vs. *P. destructans* comparison.

Table S6. Differentially expressed genes determined by DESeq2 for the Coinfected vs. MylCoV comparison.

Table S7. Differentially expressed genes determined by DESeq2 for the Coinfected vs. *P. destructans* comparison.

Table S8. Gene Ontology Enrichment Analysis (g:GOST) summary using DESeq2 determined differentially expressed genes (>2 fold change, FDR<0.05).

Table S9. Details of primers used for PCR
